# Supplementary material for: DNA methylation of ARHGAP30 is negatively associated with ARHGAP30 expression in lung adenocarcinoma, which reduces tumor immunity and is detrimental to patient survival
Source: Aging (Albany NY). 2021 Dec 15;13(24):25799–845. doi: 10.18632/aging.203762 (PMC8751594; doi:10.18632/aging.203762)
Supplement: Supplementary Figures [file aging-13-203762-s001.pdf]

## SUPPLEMENTARY FIGURES

### A The bar chart of panther pathway based GSEA of *ARHGAP30* in lung adenocarcinoma

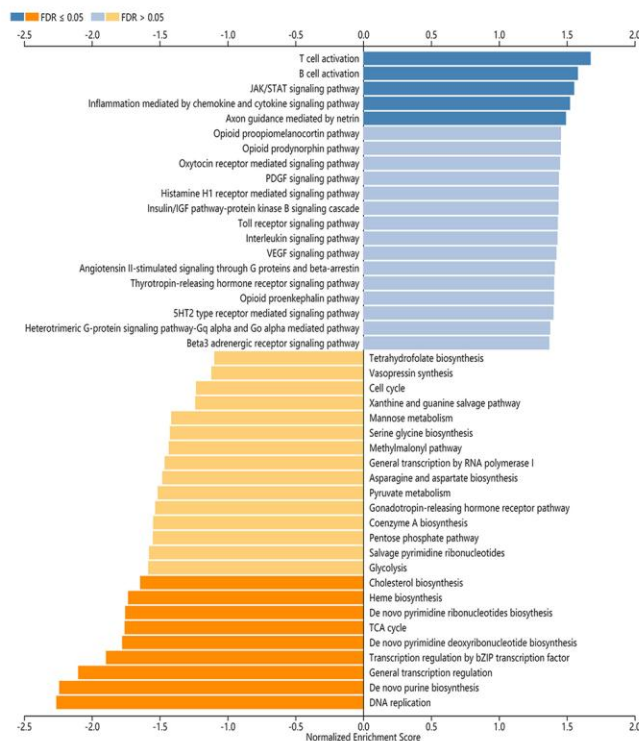

### B1 P00053: T cell activation

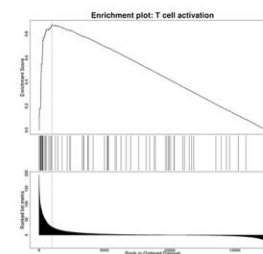

### B2 P02738: De novo purine biosynthesis

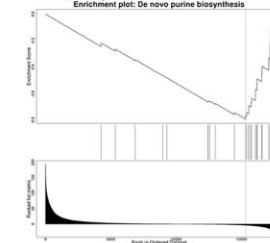

### B3 P00017: DNA replication

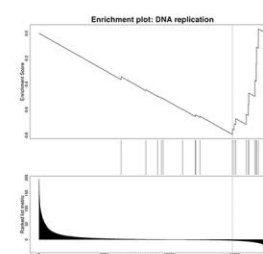

### B4 P00023: General transcription regulation

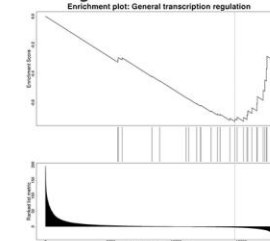

### B5 P00010: B cell activation

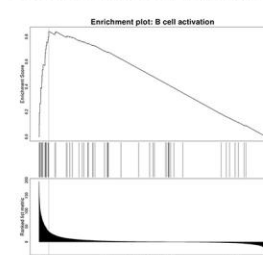

### B6 P00055: Transcription regulation by bZIP transcription factor

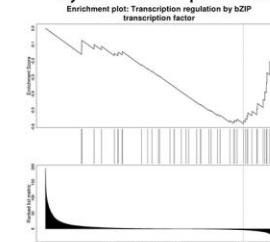

### B7 P00038: JAK/STAT signaling pathway

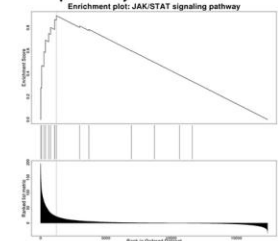

### B8 P02746: Heme biosynthesis

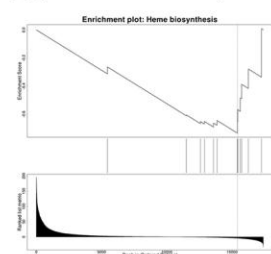

### B9 P02740: De novo pyrimidine ribonucleotides biosynthesis

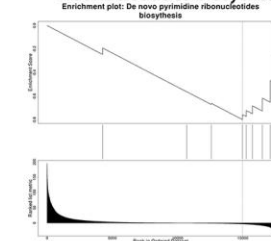

### B10 P00031: Inflammation mediated by chemokine and cytokine signaling pathway

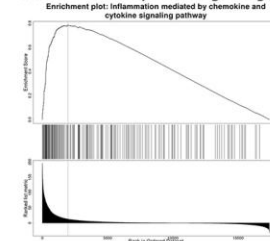

### B11 P00051: TCA cycle

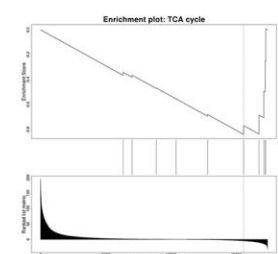

### B12 P02739: De novo pyrimidine deoxyribonucleotide biosynthesis

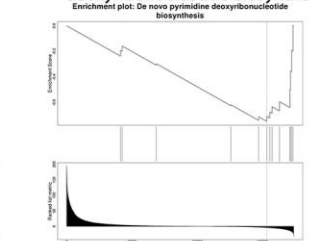

### B13 P00009: Axon guidance mediated by netrin

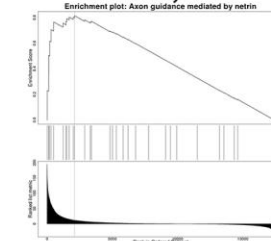

### B14 P00014: Cholesterol biosynthesis

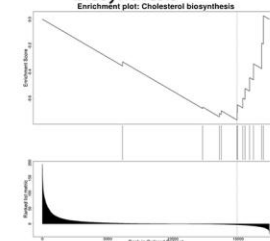

**Supplementary Figure 1. Panther pathway-based GSEA of *ARHGAP30* in lung adenocarcinoma (LUAD).** (A) Bar chart of Panther Pathway-based GSEA of *ARHGAP30* in LUAD (FDR < 0.05). (B1–B14) GSEA enrichment analysis Plots of 14 tumor immune-related Panther Pathway gene sets (FDR < 0.05).

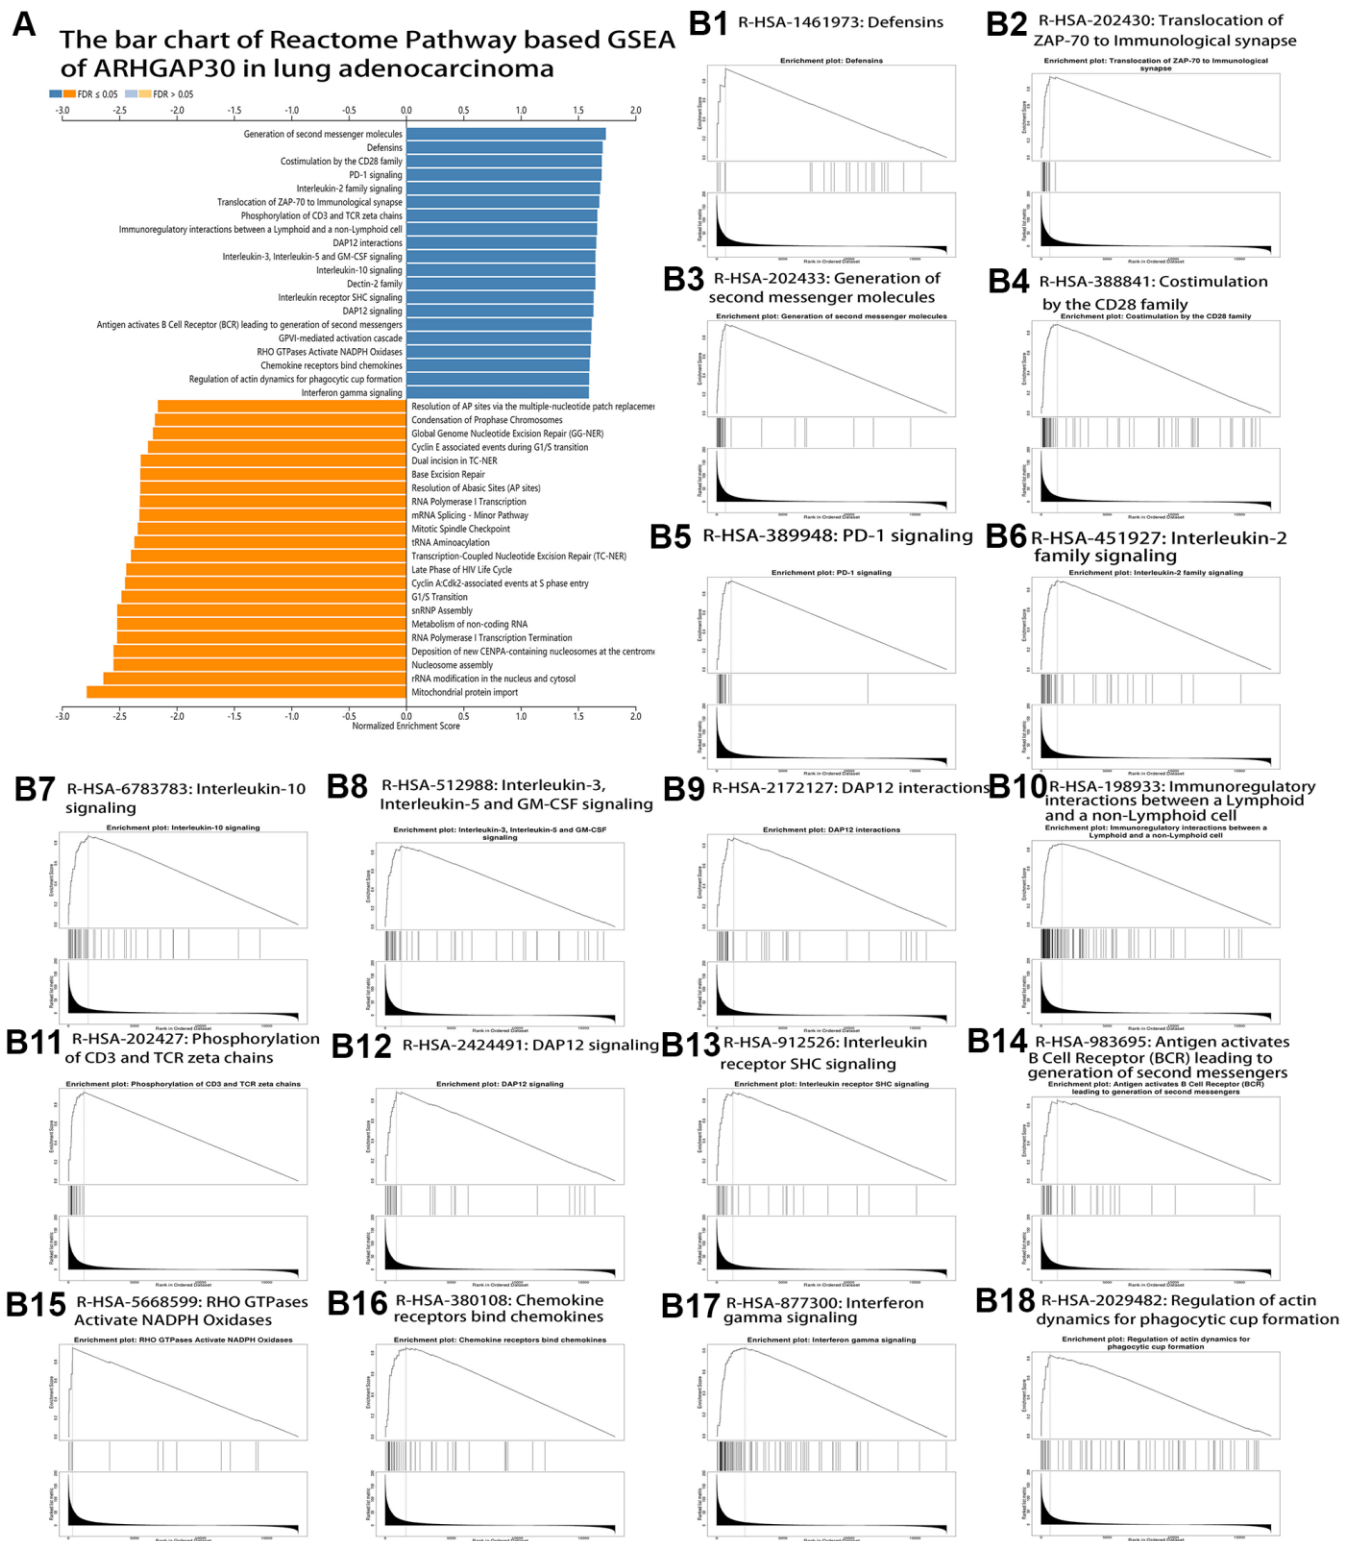

**Supplementary Figure 2. Reactome pathway-based GSEA of *ARHGAP30* in lung adenocarcinoma (LUAD).** (A) Bar chart of Reactome Pathway-based GSEA of *ARHGAP30* in LUAD (FDR < 0.05). (B1–B18) GSEA enrichment analysis Plots of 18 tumor immune-related Reactome Pathway gene sets (FDR < 0.05).

# **A** The bar chart of Wikipathway based GSEA of *ARHGAP30* in lung adenocarcinoma

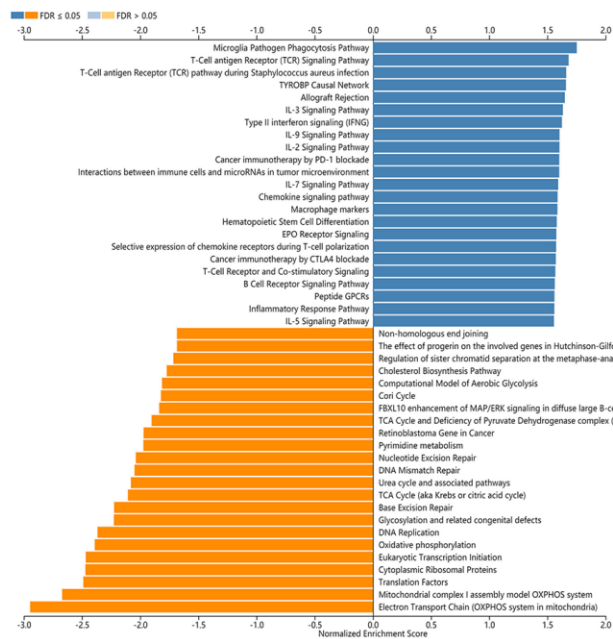

## **B1** WP69: T-Cell antigen Receptor (TCR) Signaling Pathway

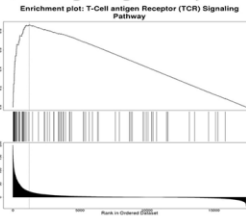

## **B2** WP3863: T-Cell antigen Receptor (TCR) pathway during Staphylococcus aureus infection

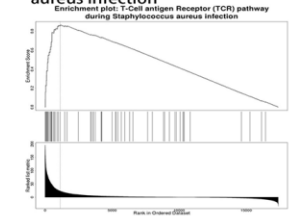

## **B3** WP2328: Allograft Rejection

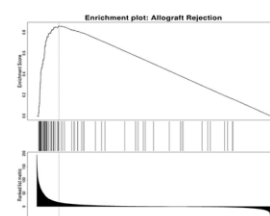

## **B4** WP286: IL-3 Signaling Pathway

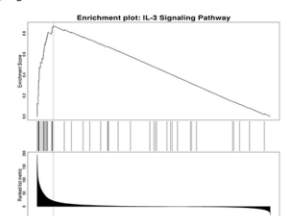

## **B5** WP619: Type II interferon signaling (IFNG)

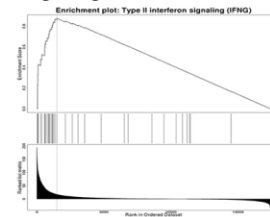

## **B6** WP4559: Interactions between immune cells and microRNAs in tumor microenvironment

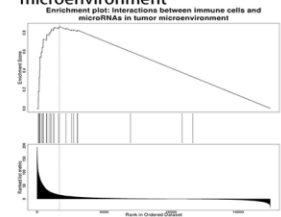

## **B7** WP4585: Cancer immunotherapy by PD-1 blockade

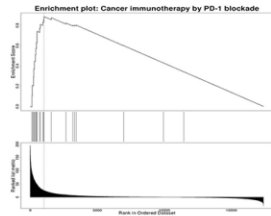

## **B8** WP49: IL-2 Signaling Pathway

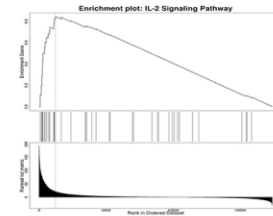

## **B9** WP22: IL-9 Signaling Pathway

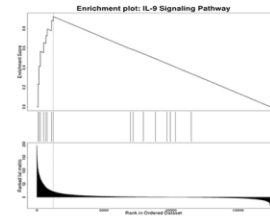

## **B10** WP205: IL-7 Signaling Pathway

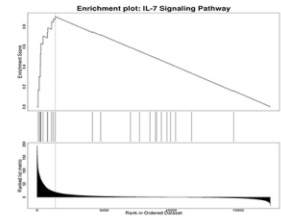

## **B11** WP4146: Macrophage markers

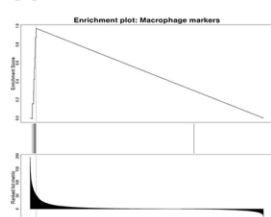

## **B12** WP3929: Chemokine signaling pathway

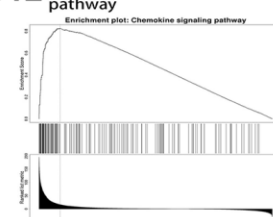

## **B13** WP4494: Selective expression of chemokine receptors during T-cell polarization

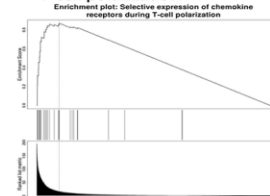

## **B14** WP4582: Cancer immunotherapy by CTLA4 blockade

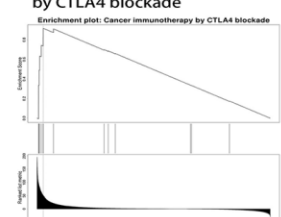

## **B15** WP2583: T-Cell Receptor and Co-stimulatory Signaling

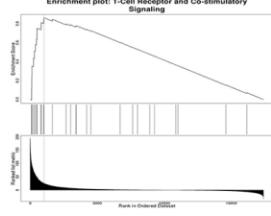

## **B16** WP23: B Cell Receptor Signaling Pathway

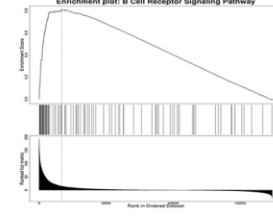

## **B17** WP453: Inflammatory Response Pathway

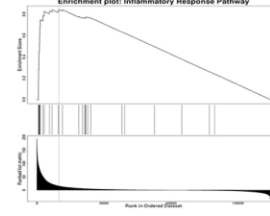

## **B18** WP127: IL-5 Signaling Pathway

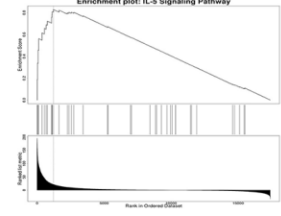

**Supplementary Figure 3. Wikipathway-based GSEA of *ARHGAP30* in lung adenocarcinoma (LUAD). (A) Bar chart of Wikipathway-based GSEA of *ARHGAP30* in LUAD (FDR < 0.05). (B1–B18) GSEA enrichment analysis Plots of 18 tumor immune-related Wikipathway gene sets (FDR < 0.05).**

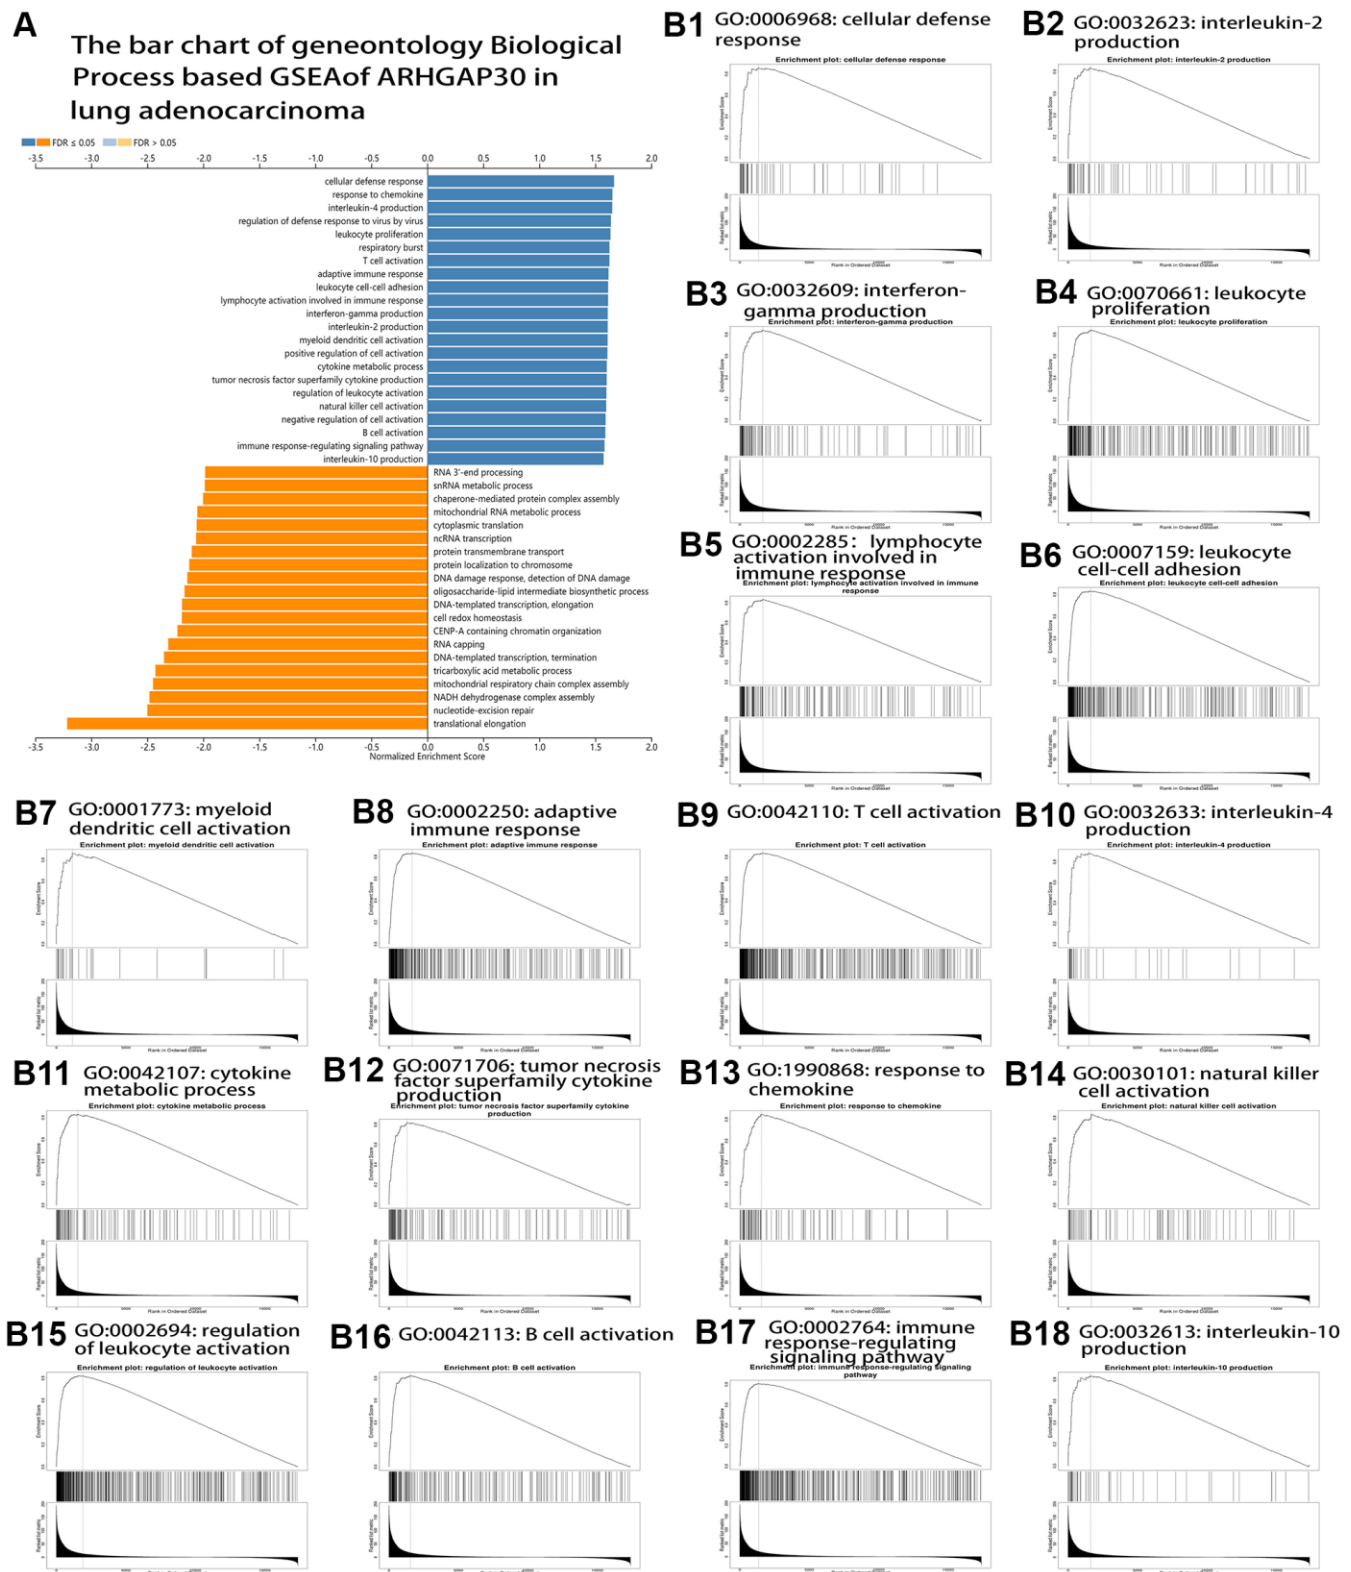

**Supplementary Figure 4. Gene ontology biological process-based GSEA of *ARHGAP30* in lung adenocarcinoma (LUAD).** (A) Bar chart of Gene Ontology Biological Process-based GSEA of *ARHGAP30* in LUAD (FDR < 0.05). (B1–B18) GSEA enrichment analysis plots of 18 tumors immune-related Gene Ontology Biological Process gene sets (FDR < 0.05).

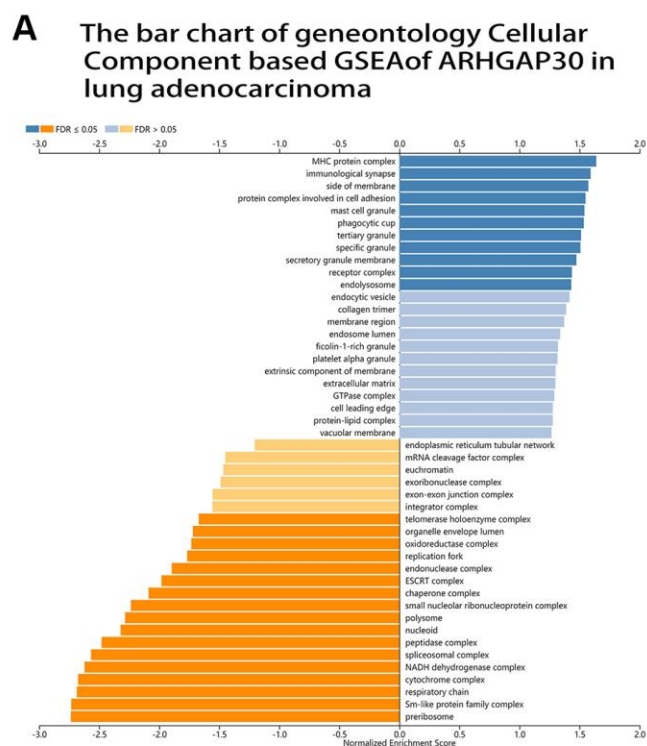

**B1** GO:0042611: MHC protein complex

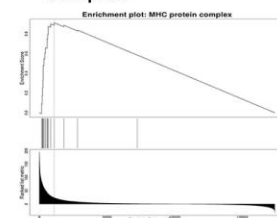

**B2** GO:0036452: ESCRT complex

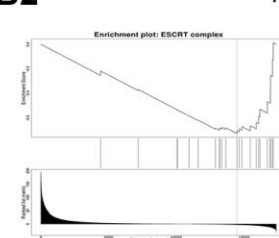

**B3** GO:0101031: chaperone complex

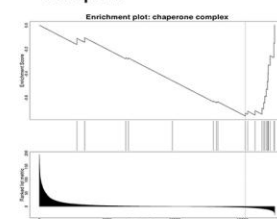

**B4** GO:0005732: small nucleolar ribonucleoprotein complex

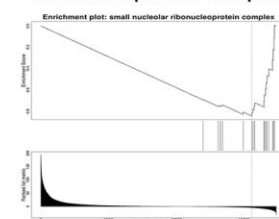

**B5** GO:0005844: polysome

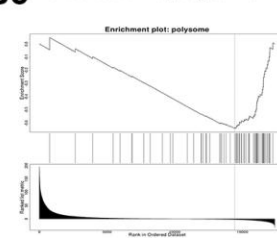

**B6** GO:0009295: nucleoid

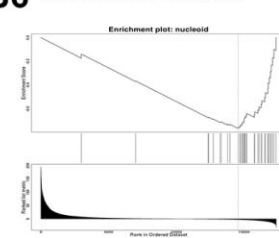

**B7** GO:1905368: peptidase complex

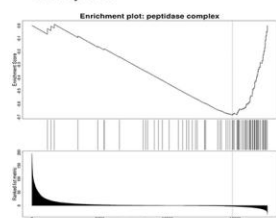

**B8** GO:0005681: spliceosomal complex

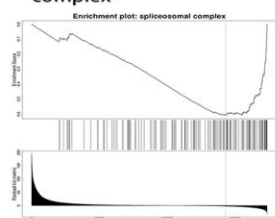

**B9** GO:0030964: NADH dehydrogenase complex

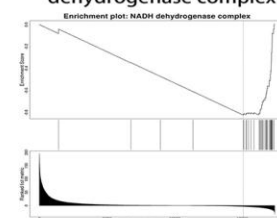

**B10** GO:0070069: cytochrome complex

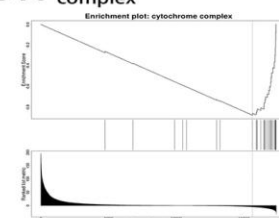

**B11** GO:0070469: respiratory chain

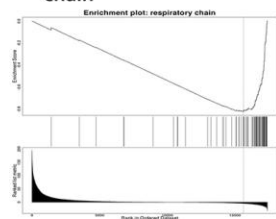

**B12** GO:0120114: Sm-like protein family complex

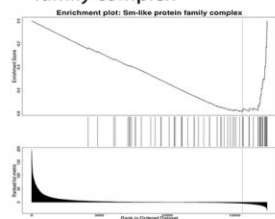

**B13** GO:0030684: preribosome

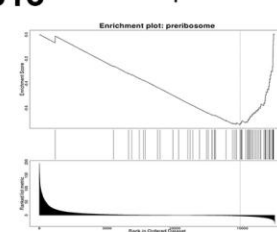

**B14** GO:0001772: immunological synapse

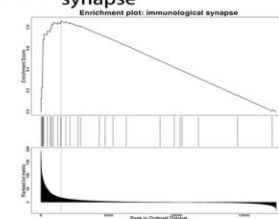

**B15** GO:1905348: endonuclease complex

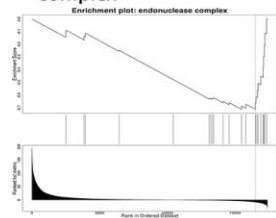

**B16** GO:0098552: side of membrane

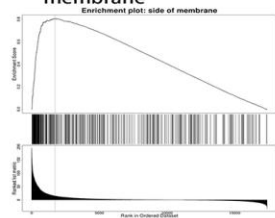

**B17** GO:0098636: protein complex involved in cell adhesion

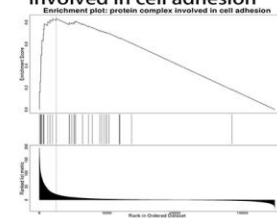

**B18** GO:0042629: mast cell granule

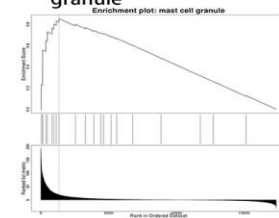

**Supplementary Figure 5. Gene ontology cellular component-based GSEA of *ARHGAP30* in lung adenocarcinoma (LUAD). (A)** Bar chart of Gene Ontology Cellular Component-based GSEA of *ARHGAP30* in LUAD (FDR < 0.05). **(B1–B18)** GSEA enrichment analysis plots of 18 tumors immune-related Gene Ontology Cellular Component gene sets (FDR < 0.05).

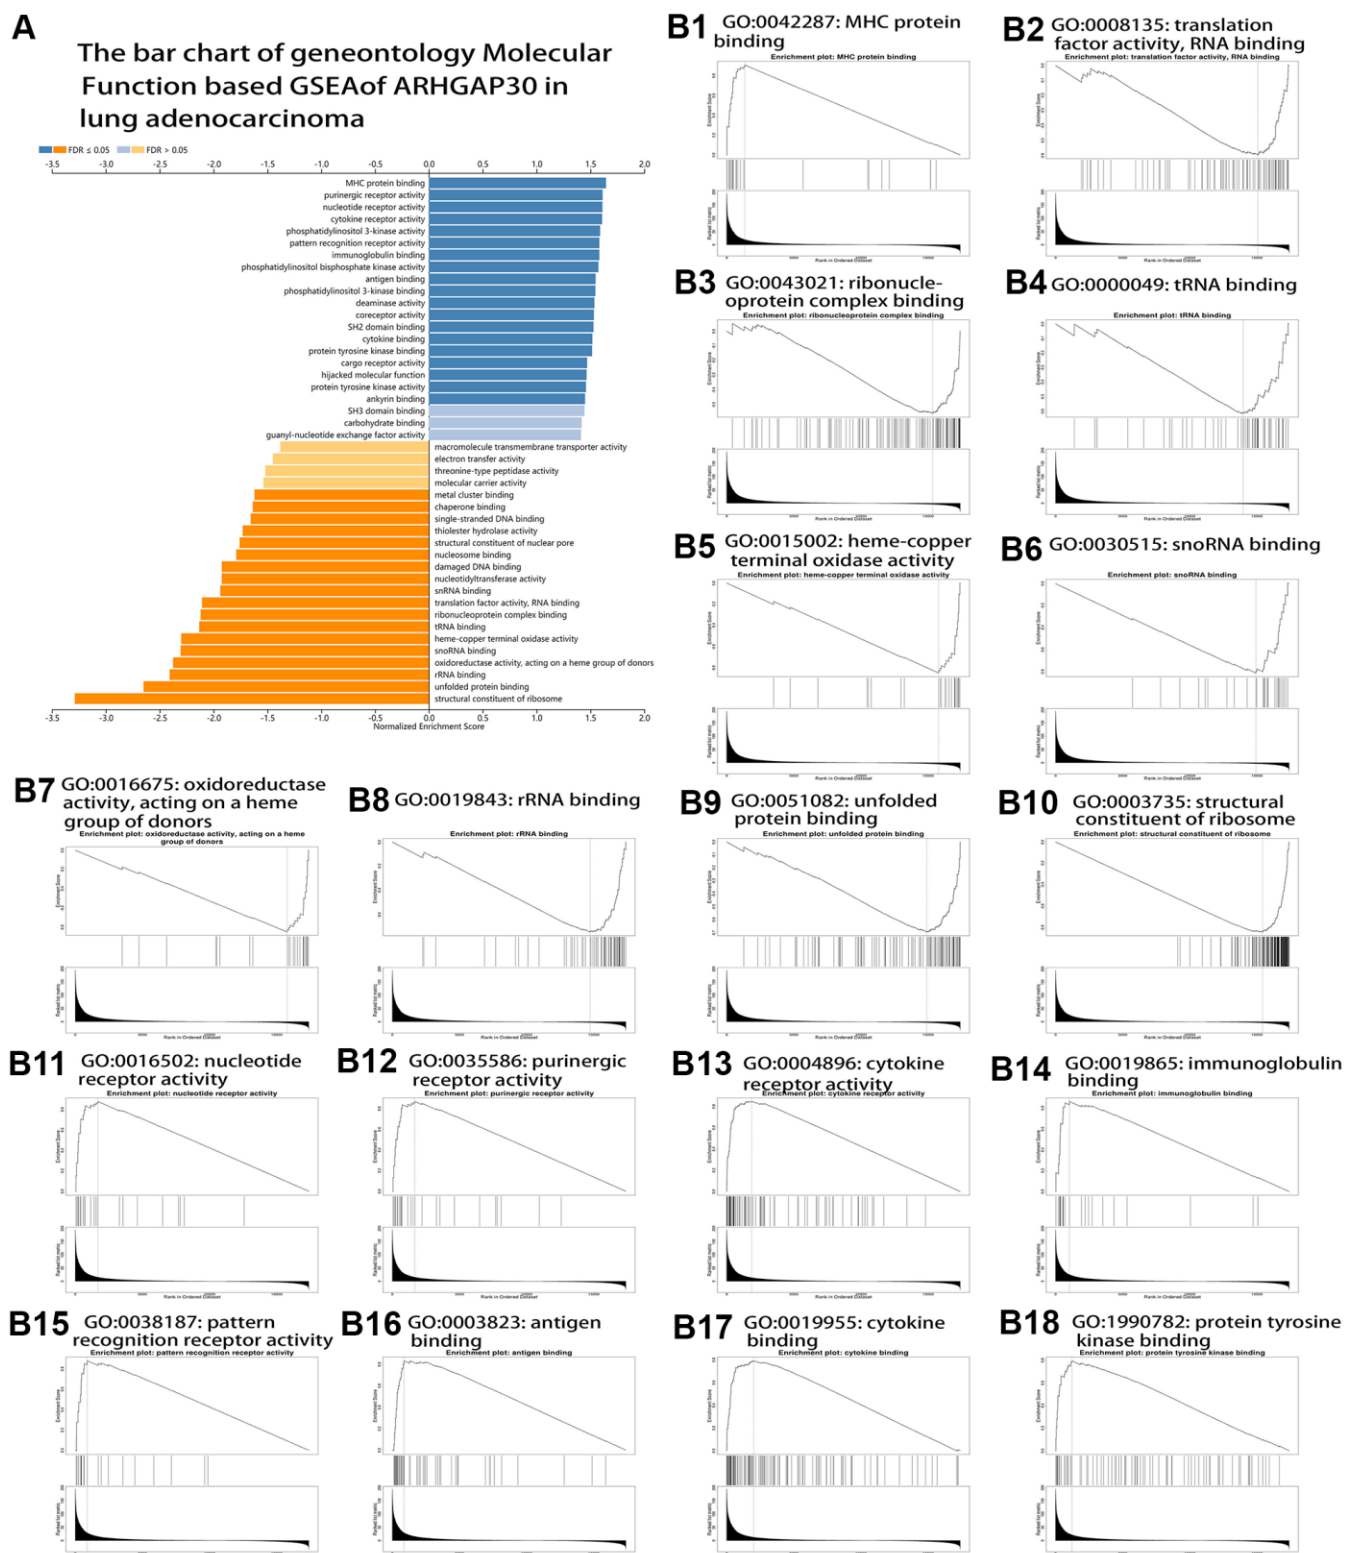

**Supplementary Figure 6. Gene ontology molecular function-based GSEA of ARHGAP30 in lung adenocarcinoma (LUAD). (A)** Bar chart of Gene Ontology Molecular Function-based GSEA of ARHGAP30 in LUAD (FDR < 0.05). **(B1–B18)** GSEA enrichment analysis plots of 18 tumors immune-related Gene Ontology Molecular Function gene sets (FDR < 0.05).

# **A** The bar chart of geneontology Kinase target network based GSEA of ARHGAP30 in lung adenocarcinoma

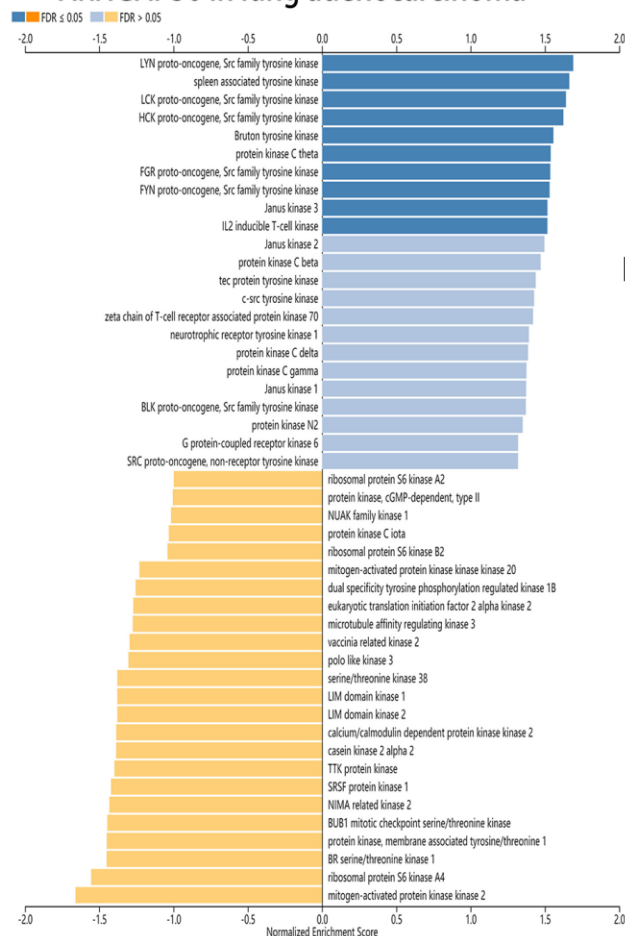

## **B1** Kinase\_LYN: LYN proto-oncogene , Src family tyrosine kinase

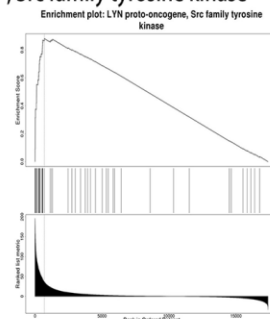

## **B2** Kinase\_SYK: spleen associated tyrosine kinase

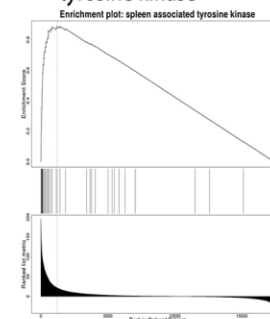

## **B3** Kinase\_LCK: LCK proto-oncogene , Src family tyrosine kinase

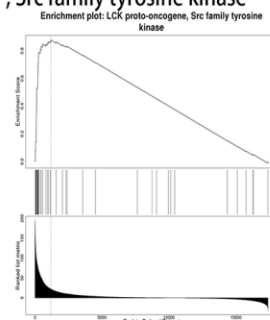

## **B4** Kinase\_HCK: HCK proto-oncogene , Src family tyrosine kinase

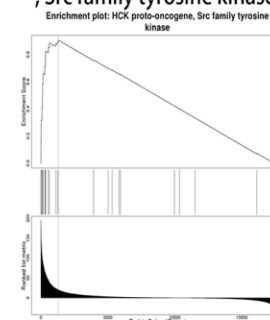

## **B5** Kinase\_BTK: Bruton tyrosine kinase

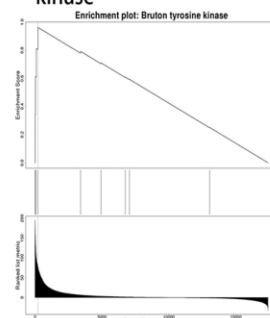

## **B6** Kinase\_FGR: FGR proto-oncogene , Src family tyrosine kinase

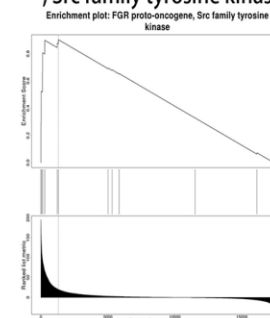

## **B7** Kinase\_FYN: FYN proto-oncogene , Src family tyrosine kinase

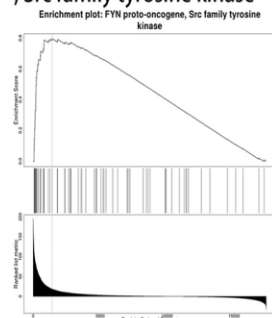

## **B8** Kinase\_PRKCO: protein kinase C theta

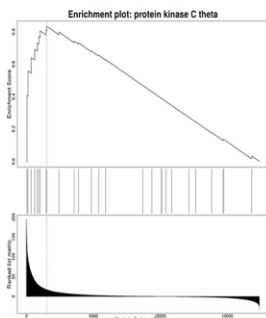

## **B9** Kinase\_ITK: IL2 inducible T-cell kinase

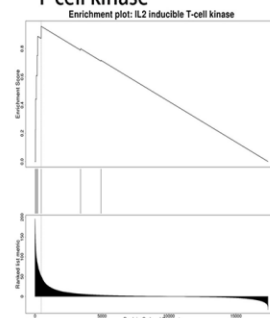

## **B10** Kinase\_JAK3: Janus kinase 3

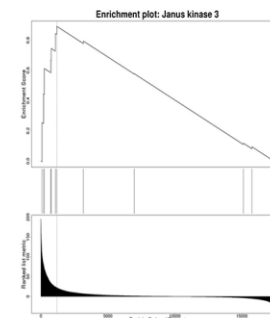

**Supplementary Figure 7. Kinase target network-based GSEA of ARHGAP30 in lung adenocarcinoma (LUAD).** (A) Bar chart of Kinase Target Network-based GSEA of ARHGAP30 in LUAD (FDR < 0.05). (B1–B10) GSEA enrichment analysis plots of 10 tumor immune-related Kinase Target Network gene sets (FDR < 0.05).

# **A** The bar chart of geneontology Transcription Factor network based GSEA of ARHGAP30 in lung adenocarcinoma

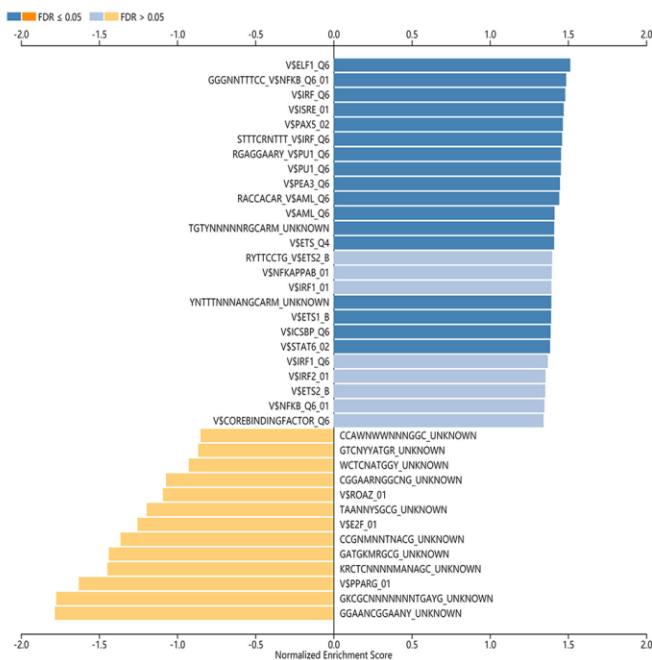

## **B1** V\$PU1\_Q6

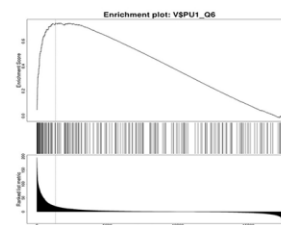

## **B2** V\$PEA3\_Q6

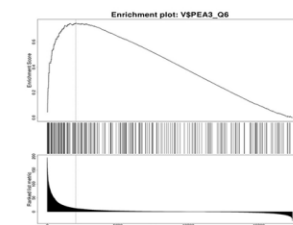

## **B3** RACCACAR\_V\$AML\_Q6

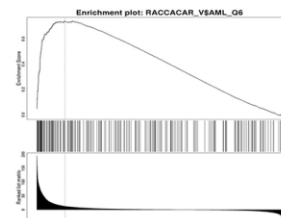

## **B4** RGAGGAARY\_V\$PU1\_Q6

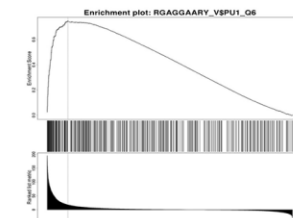

## **B5** STTCRNTTT\_V\$IRF\_Q6

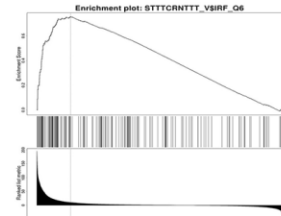

## **B6** V\$PAX5\_Q2

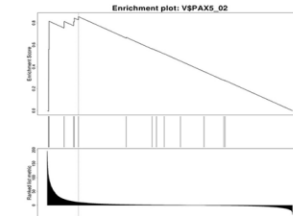

## **B7** V\$ISRE\_01

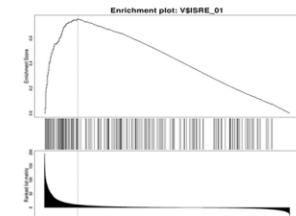

## **B8** V\$IRF\_Q6

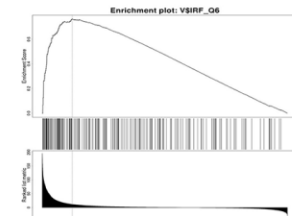

## **B9** V\$SELF1\_Q6

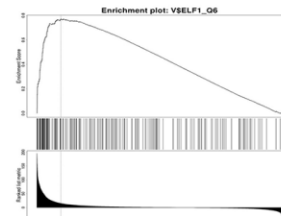

## **B10** V\$SETS\_Q4

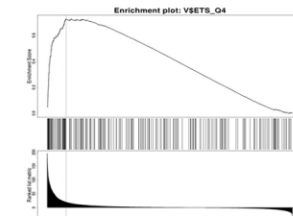

## **B11** TGTYNNNNNRGCARM\_UNKNOWN

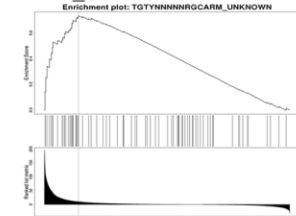

## **B12** V\$ICSBP\_Q6

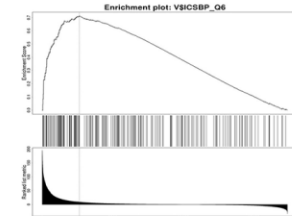

## **B13** V\$SET1\_B

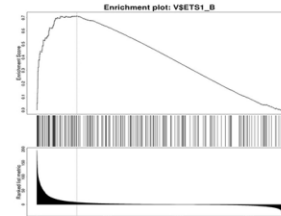

## **B14** V\$STAT6\_Q2

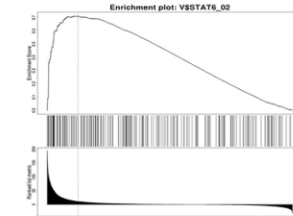

## **B15** V\$AML\_Q6

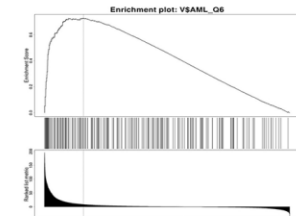

## **B16** GGGNNTTCC\_V\$NFKB\_Q6\_01

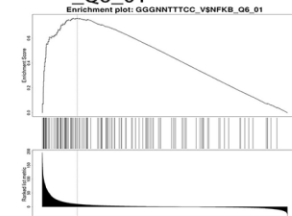

## **B17** YNTTTNNNANGCARM\_UNKNOWN

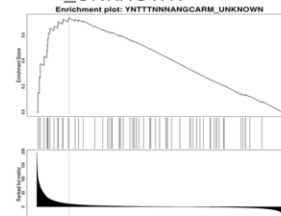

**Supplementary Figure 8. Transcription factor network-based GSEA of ARHGAP30 in lung adenocarcinoma (LUAD).** (A) Bar chart of Transcription Factor Network-based GSEA of ARHGAP30 in LUAD (FDR < 0.05). (B1–B17) GSEA enrichment analysis plots of 17 tumor immune-related Transcription Factor Network gene sets (FDR < 0.05).

# **A** The bar chart of geneontology PPI\_BIOGRID network based GSEA of ARHGAP30 in lung adenocarcinoma

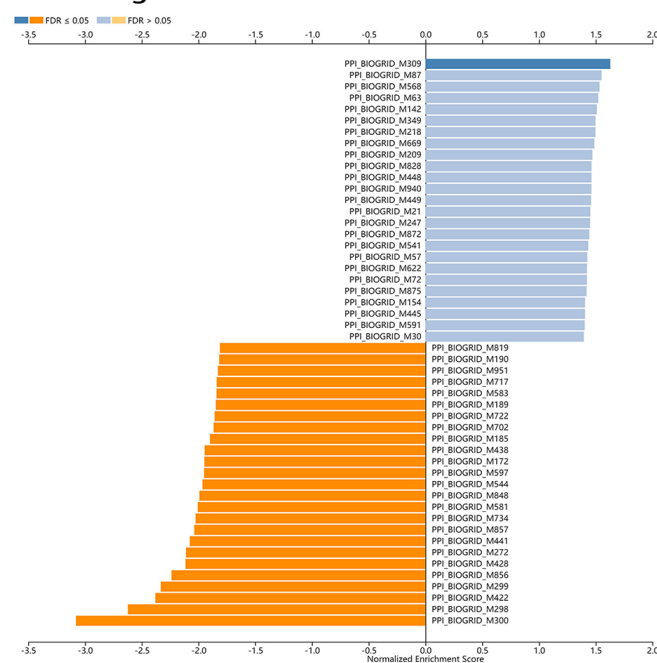

## **B1** PPI\_BIOGRID\_M856

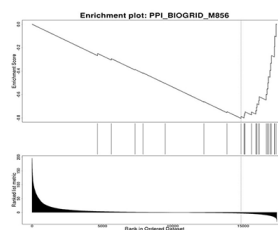

## **B2** PPI\_BIOGRID\_M299

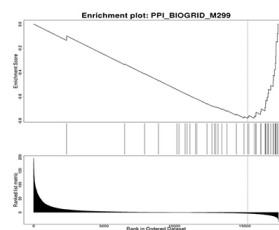

## **B3** PPI\_BIOGRID\_M422

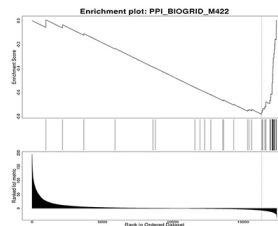

## **B4** PPI\_BIOGRID\_M298

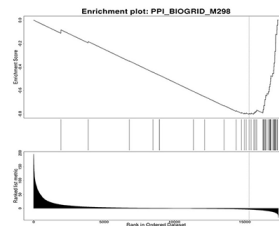

## **B5** PPI\_BIOGRID\_M300

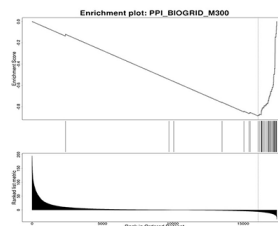

## **B6** PPI\_BIOGRID\_M272

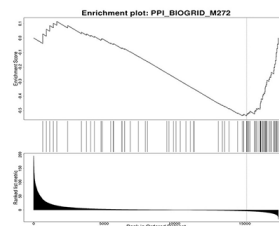

## **B7** PPI\_BIOGRID\_M428

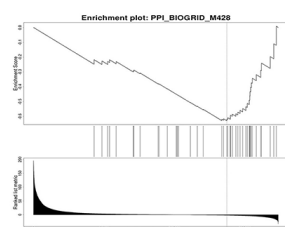

## **B8** PPI\_BIOGRID\_M441

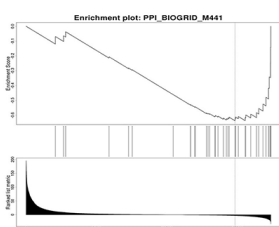

## **B9** PPI\_BIOGRID\_M734

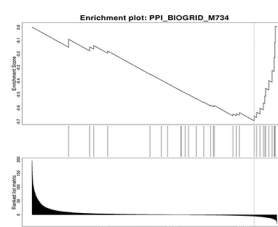

## **B10** PPI\_BIOGRID\_M848

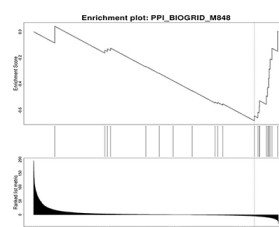

## **B11** PPI\_BIOGRID\_M857

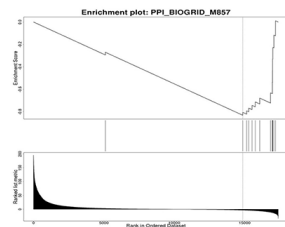

## **B12** PPI\_BIOGRID\_M581

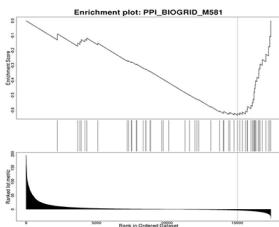

## **B13** PPI\_BIOGRID\_M172

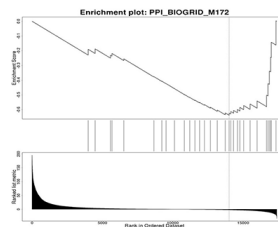

## **B14** PPI\_BIOGRID\_M544

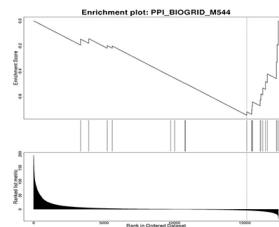

## **B15** PPI\_BIOGRID\_M438

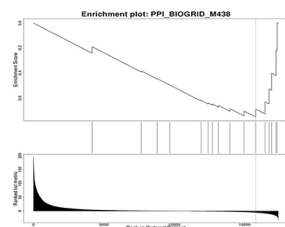

## **B16** PPI\_BIOGRID\_M597

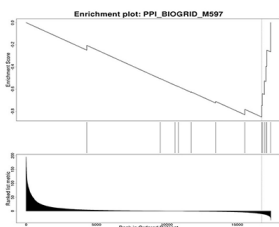

## **B17** PPI\_BIOGRID\_M309

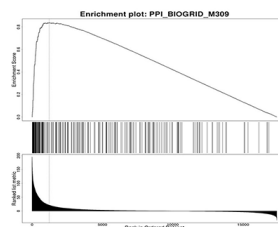

## **B18** PPI\_BIOGRID\_M185

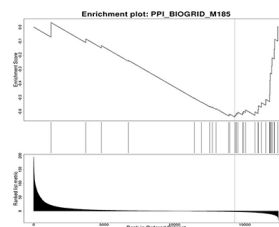

**Supplementary Figure 9. PPI BIOGRID network-based GSEA of ARHGAP30 in lung adenocarcinoma (LUAD).** (A) Bar chart of PPI BIOGRID Network-based GSEA of ARHGAP30 in LUAD (FDR < 0.05). (B1–B18) GSEA enrichment analysis plots of 18 tumor immune-related PPI BIOGRID Network gene sets (FDR < 0.05).

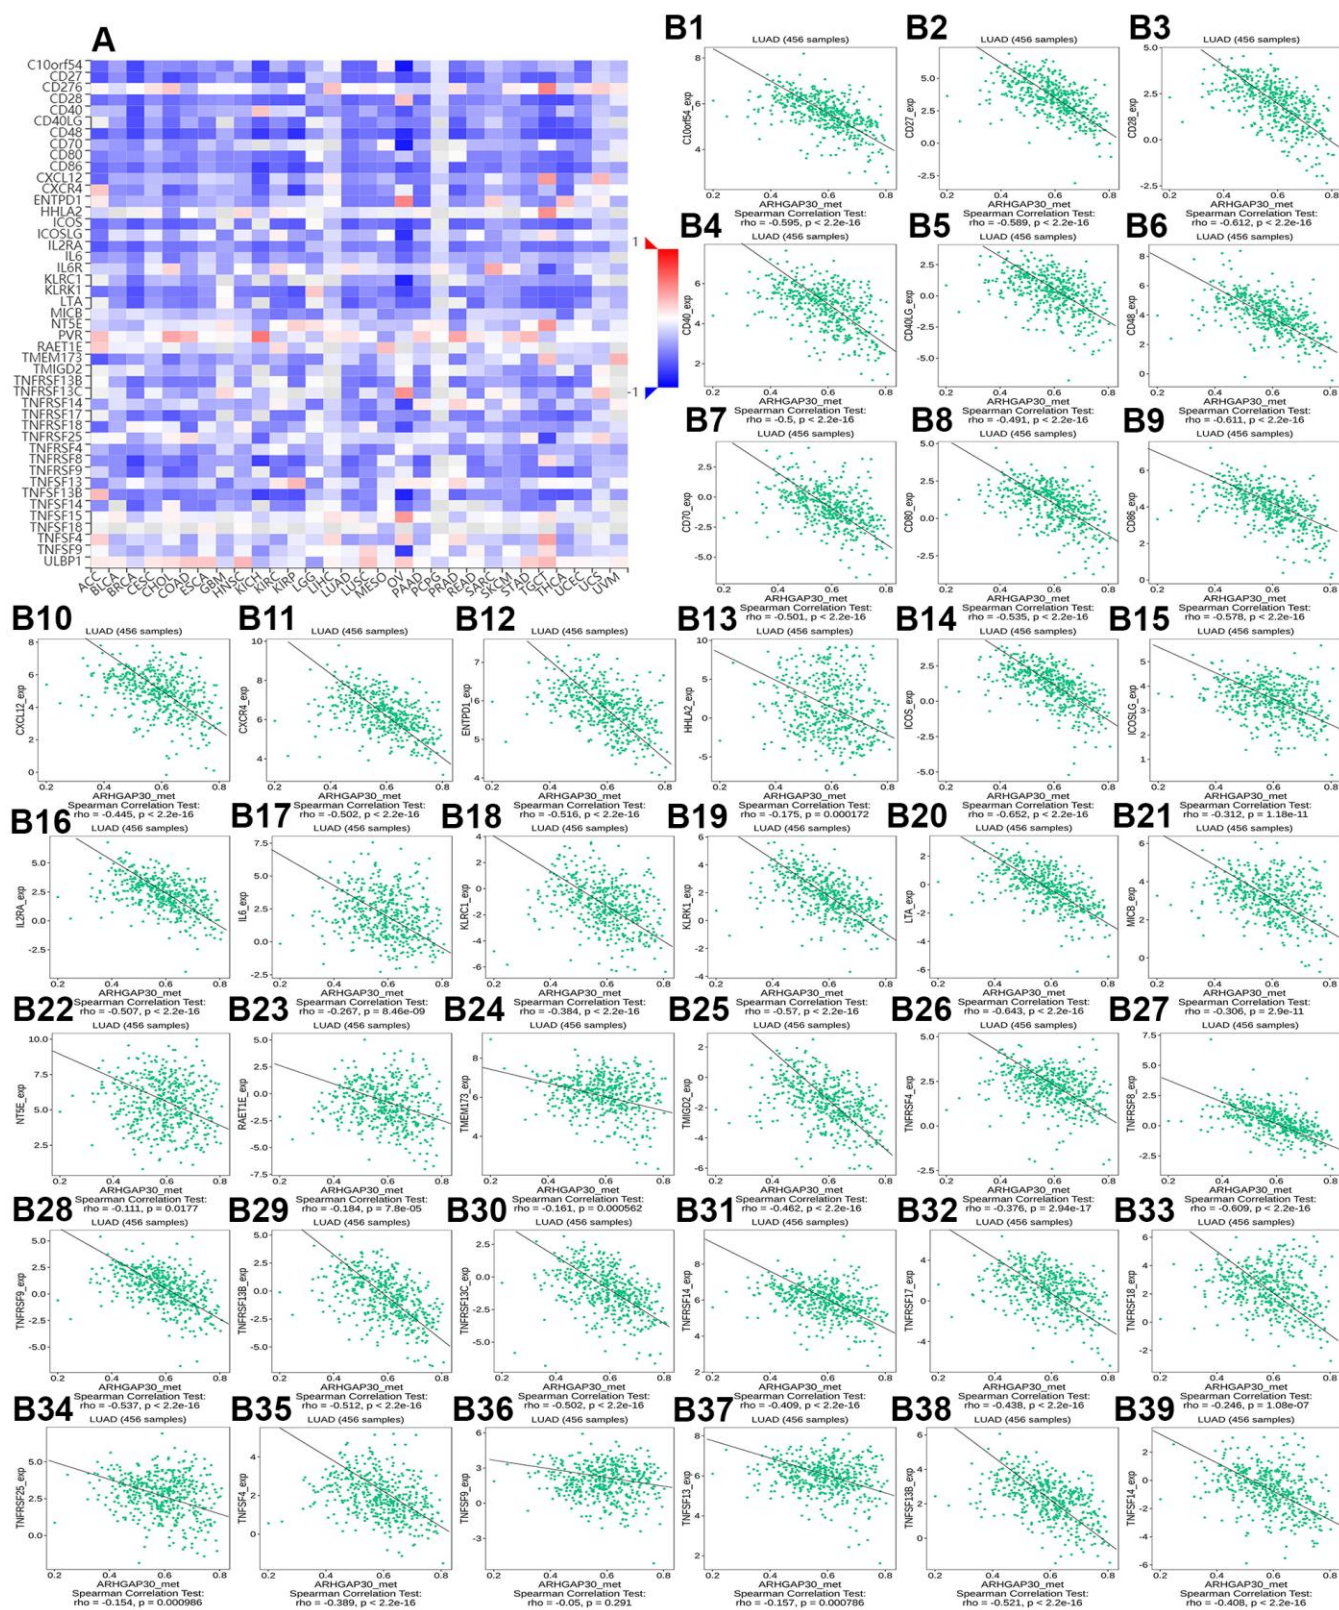

**Supplementary Figure 10.** The correlation between the expression of *ARHGAP30* and MHC molecules. (A) Heat map of Spearman correlations between *ARHGAP30* expression and MHC molecules across human cancers. (B1–B39) Scatter plots showing the positive correlation between *ARHGAP30* expression and MHC molecules in the treatment of lung adenocarcinoma.

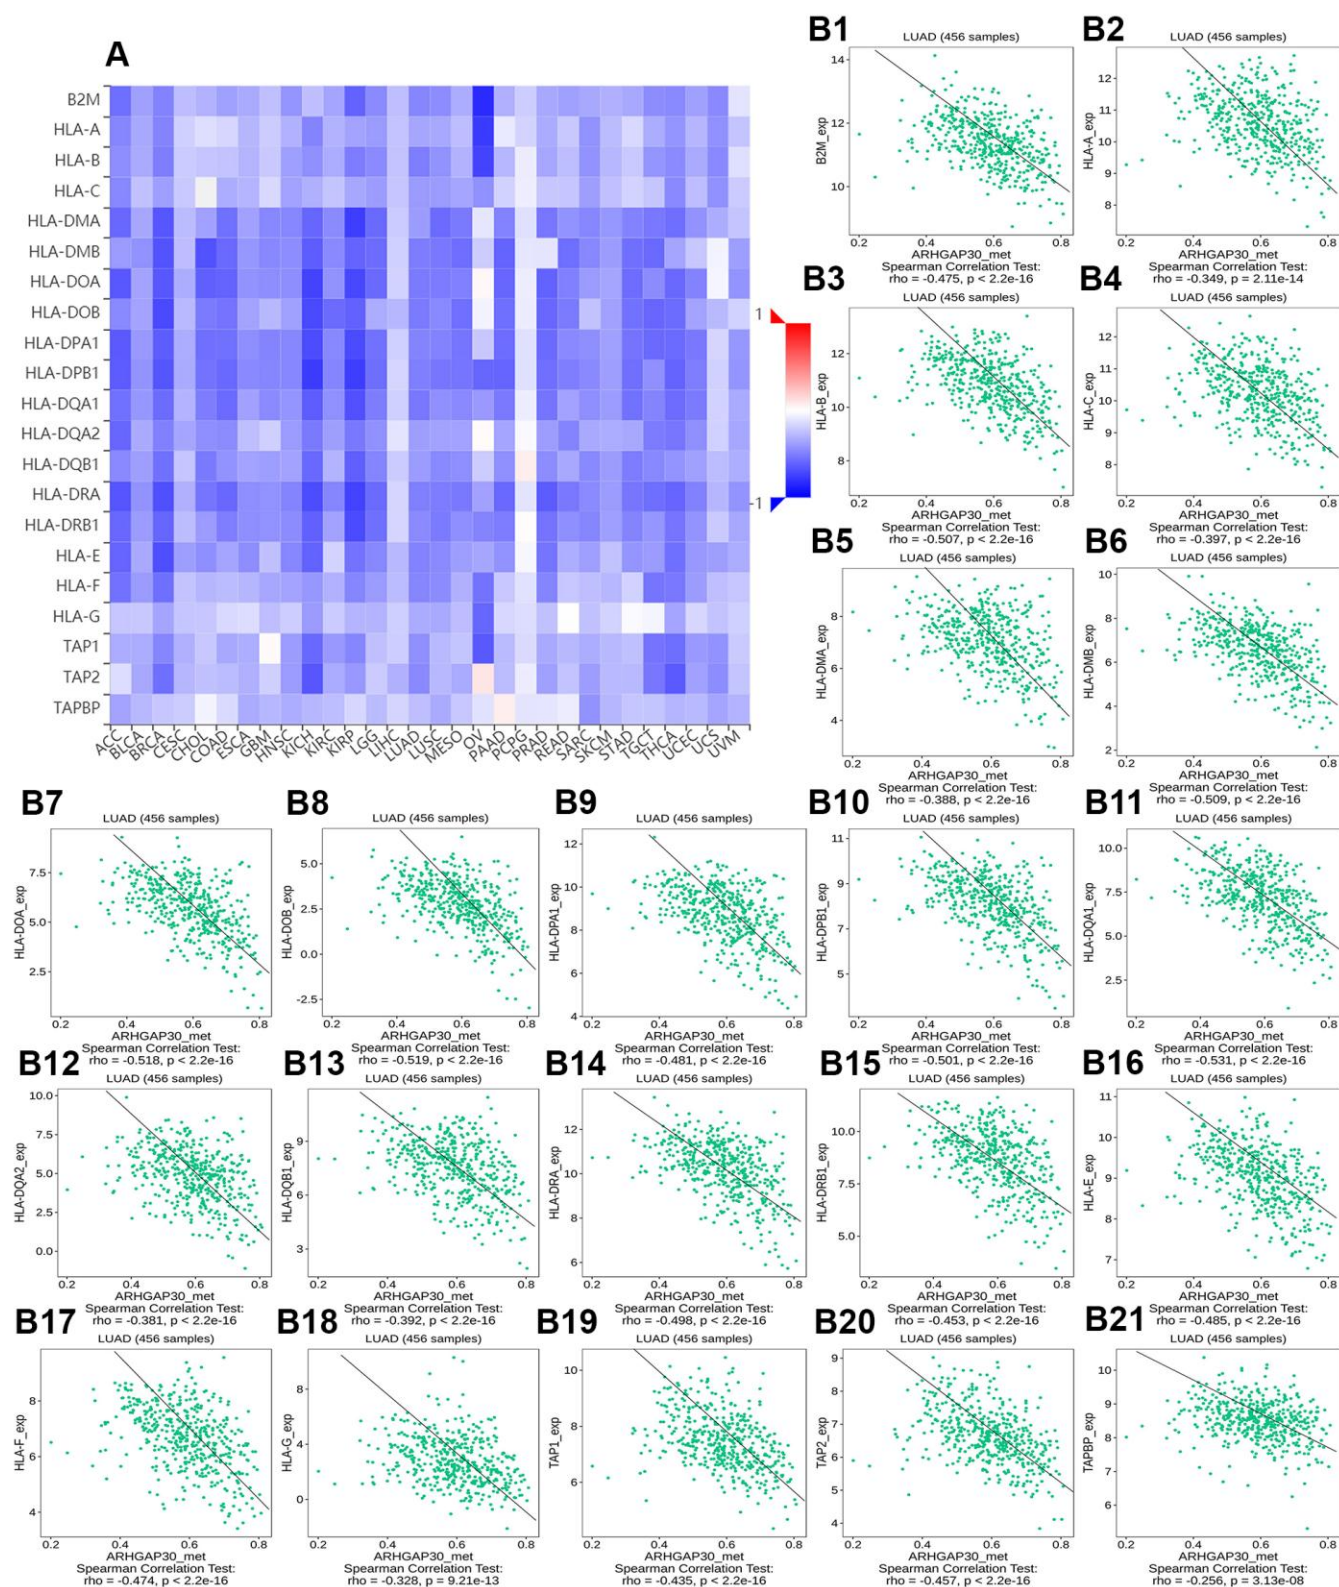

**Supplementary Figure 11. The correlation between the DNA methylation of *ARHGAP30* and MHC molecules. (A)** Heat map of Spearman correlations between DNA methylation of *ARHGAP30* and MHC molecules across human cancers. **(B1–B21)** Scatter plots showing the negative correlation between DNA methylation of *ARHGAP30* and MHC molecules in the treatment of lung adenocarcinoma.

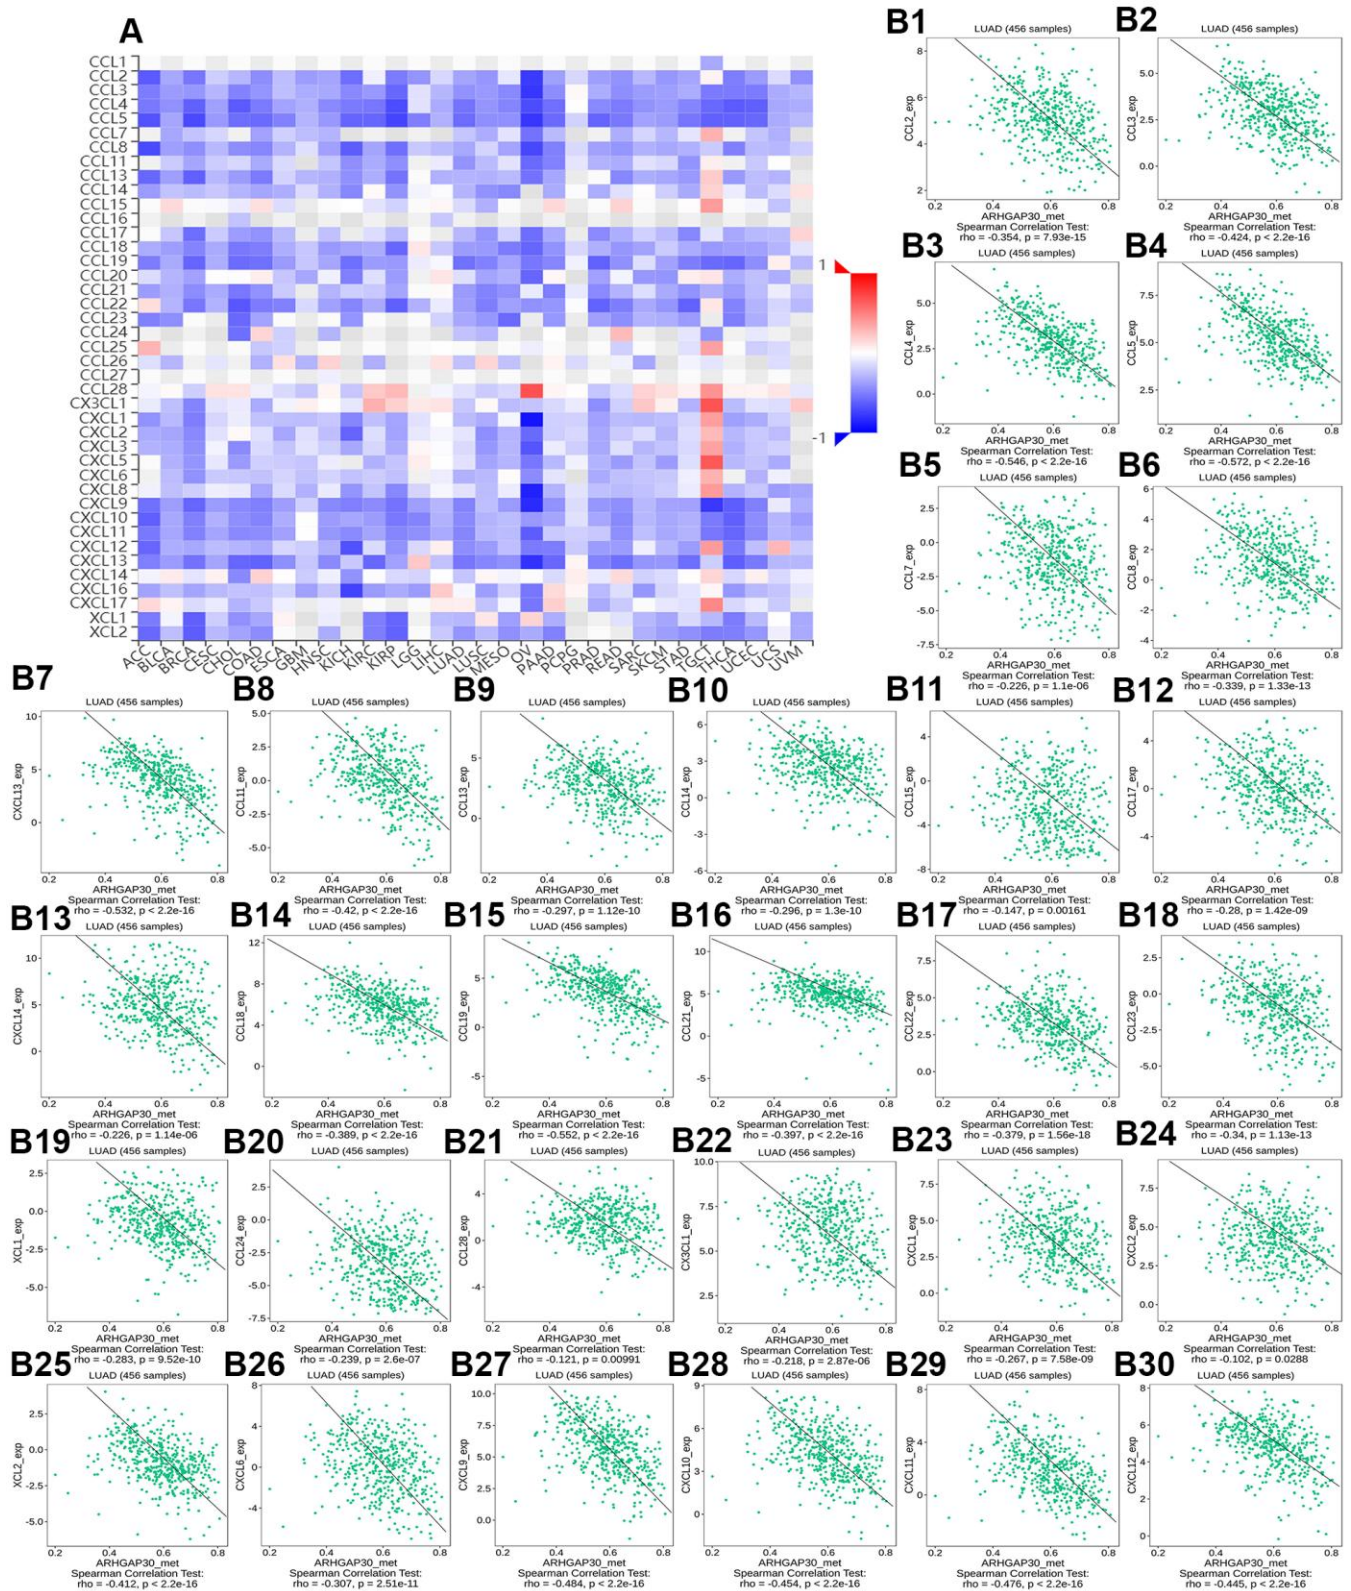

**Supplementary Figure 12. The correlation between the expression of *ARHGAP30* and chemokines. (A) Heat map of Spearman correlations between *ARHGAP30* expression and chemokines across human cancers. (B1–B30) Scatter plots showing the positive correlation between *ARHGAP30* expression and chemokines in the treatment of lung adenocarcinoma.**

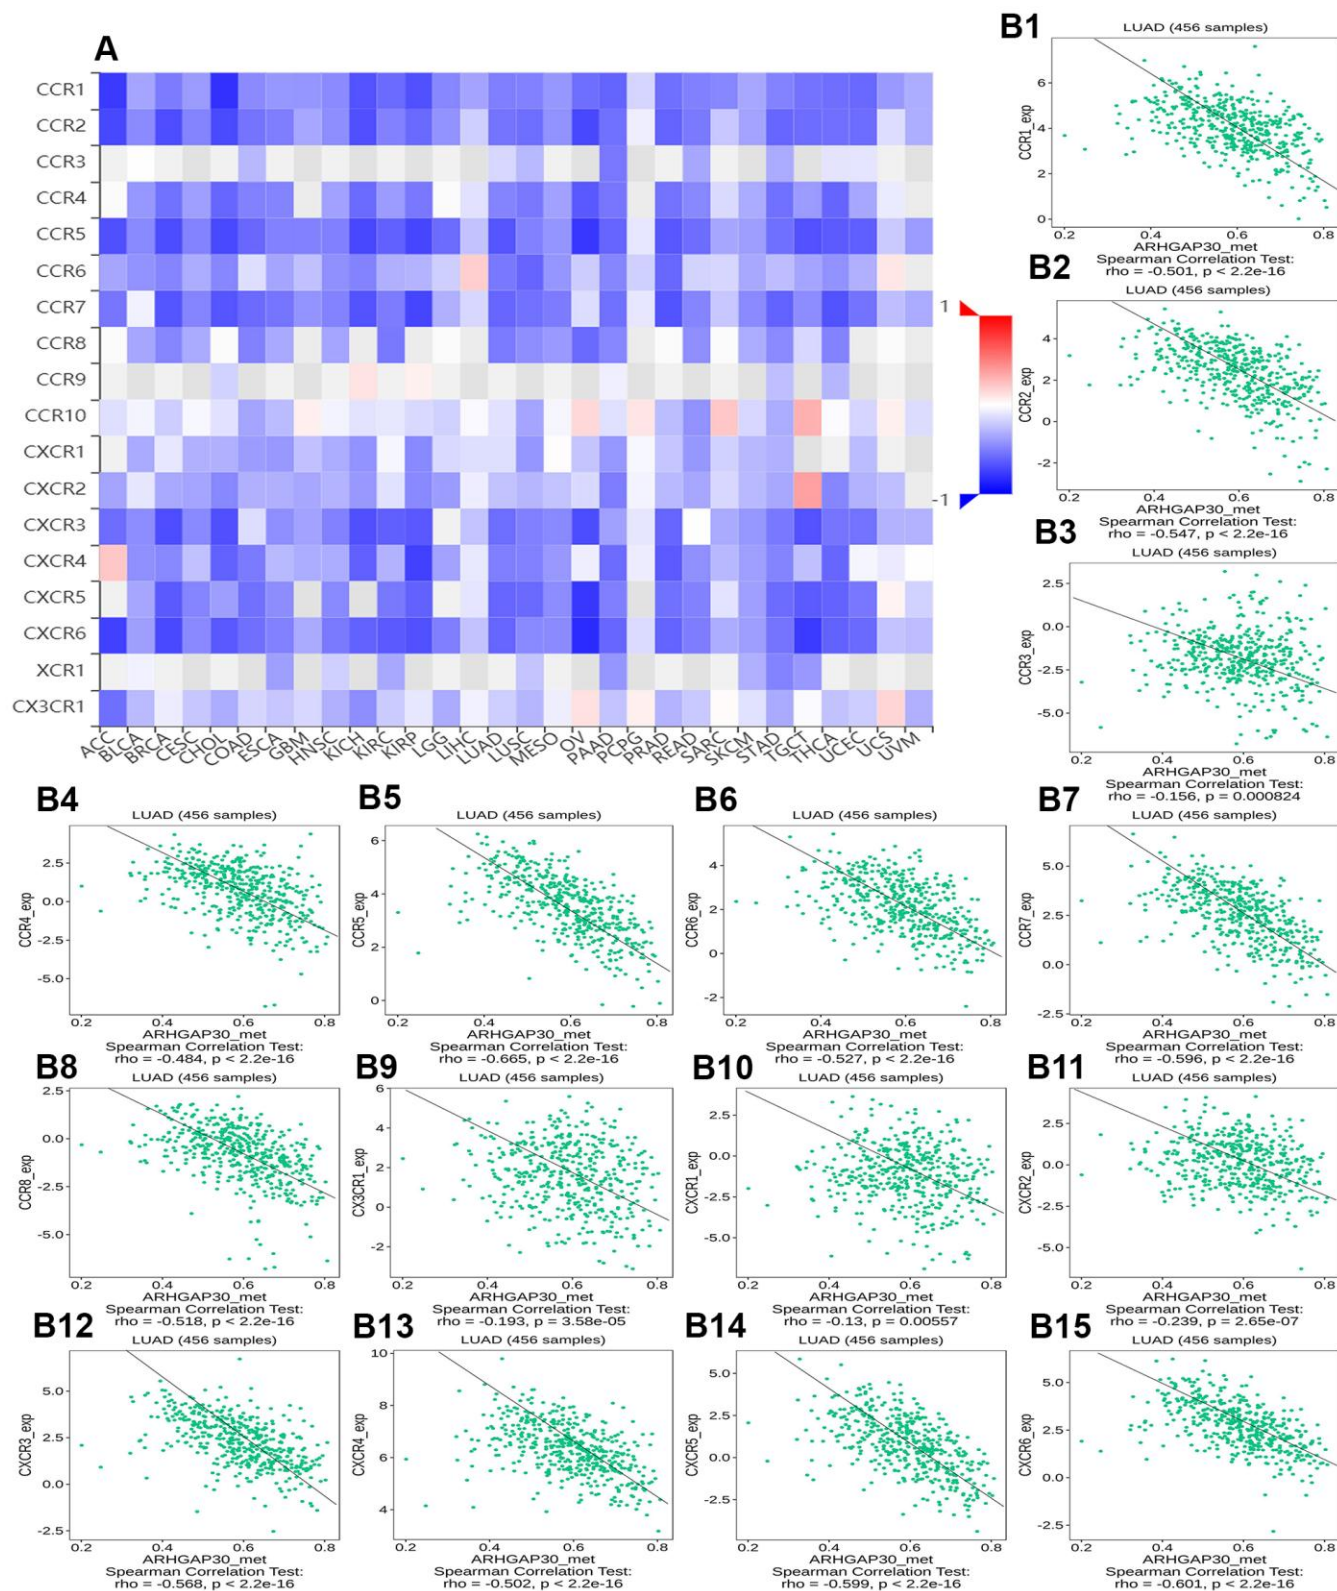

**Supplementary Figure 13. The correlation between the expression of *ARHGAP30* and Chemokine Receptors.** (A) Heat map of Spearman correlations between *ARHGAP30* expression and chemokine receptors across human cancers. (B1–B15) Scatter plots showing the positive correlation between *ARHGAP30* expression and chemokine receptors in the treatment of lung adenocarcinoma.
